# Supplementary material
Source: PubMed Central journal article supplement (PMC9985427)

VARIABLES FROM LITERATURE

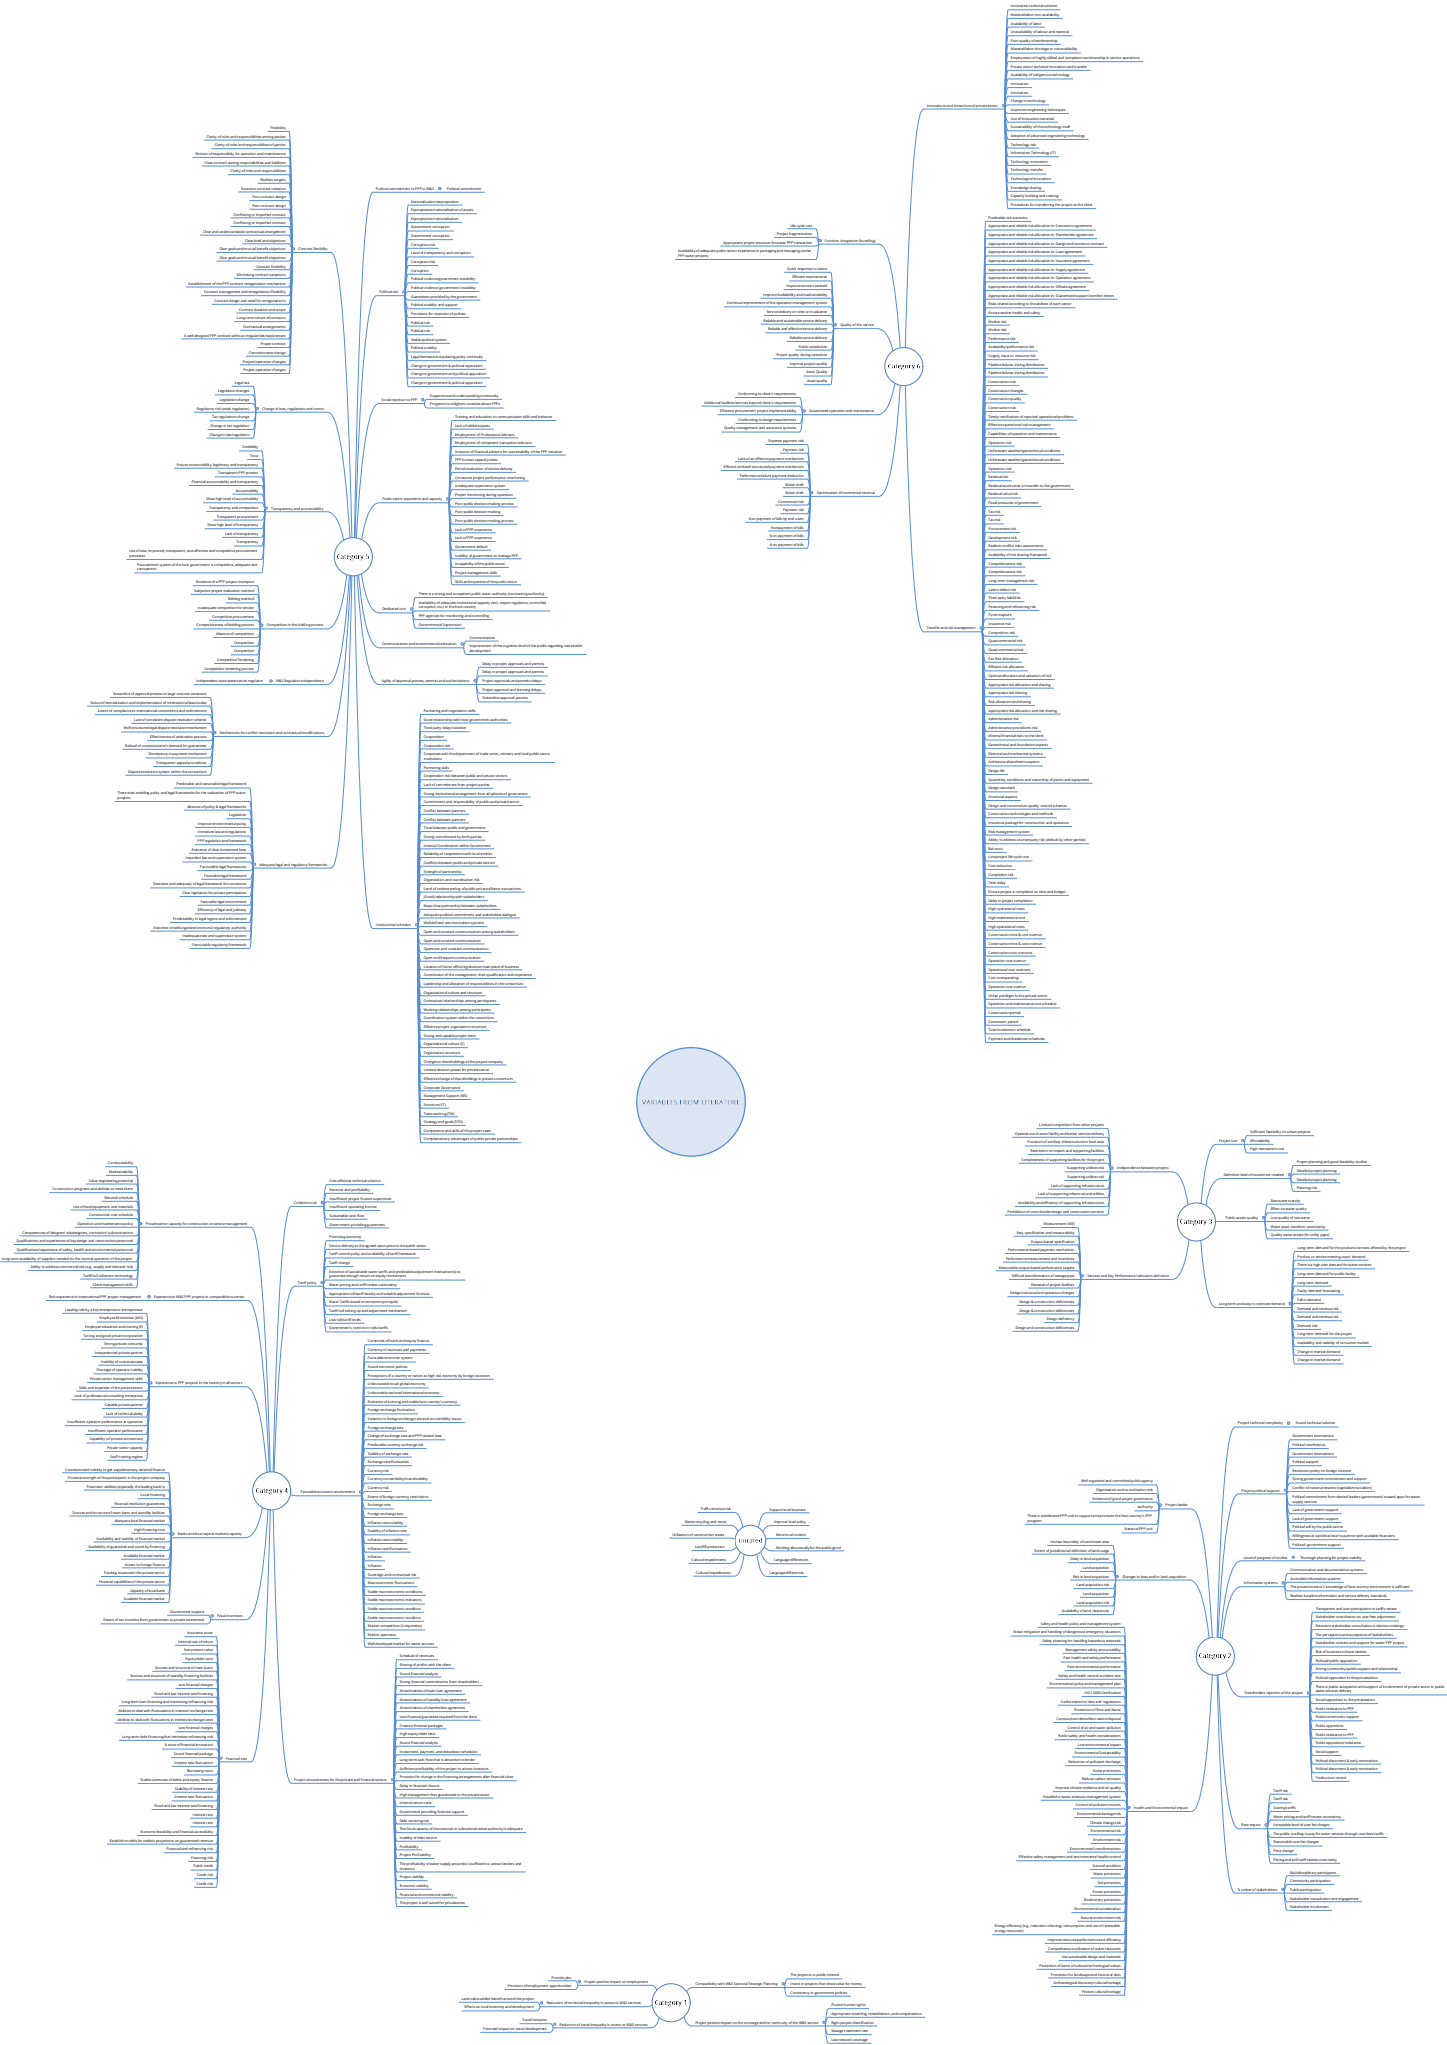

Supplement: mmc1.pdf [file mmc1.pdf]
